# Supplementary material for: Duplex of capped-cyclodextrins, synthesis and cross-linking behaviour with a biopolymer
Source: Royal Society of Chemistry journal article supplement (doi:10.1039/c001531h), 2010-01-01

## Supplementary onformation

### Duplex of capped-cyclodextrins, synthesis and cross-linking behaviour with a biopolymer

Olivia Bistri-Aslanoff, Yves Blériot, Rachel Auzely-Velty, \* Matthieu Sollogoub\*

#### Capped-CD duplex 4

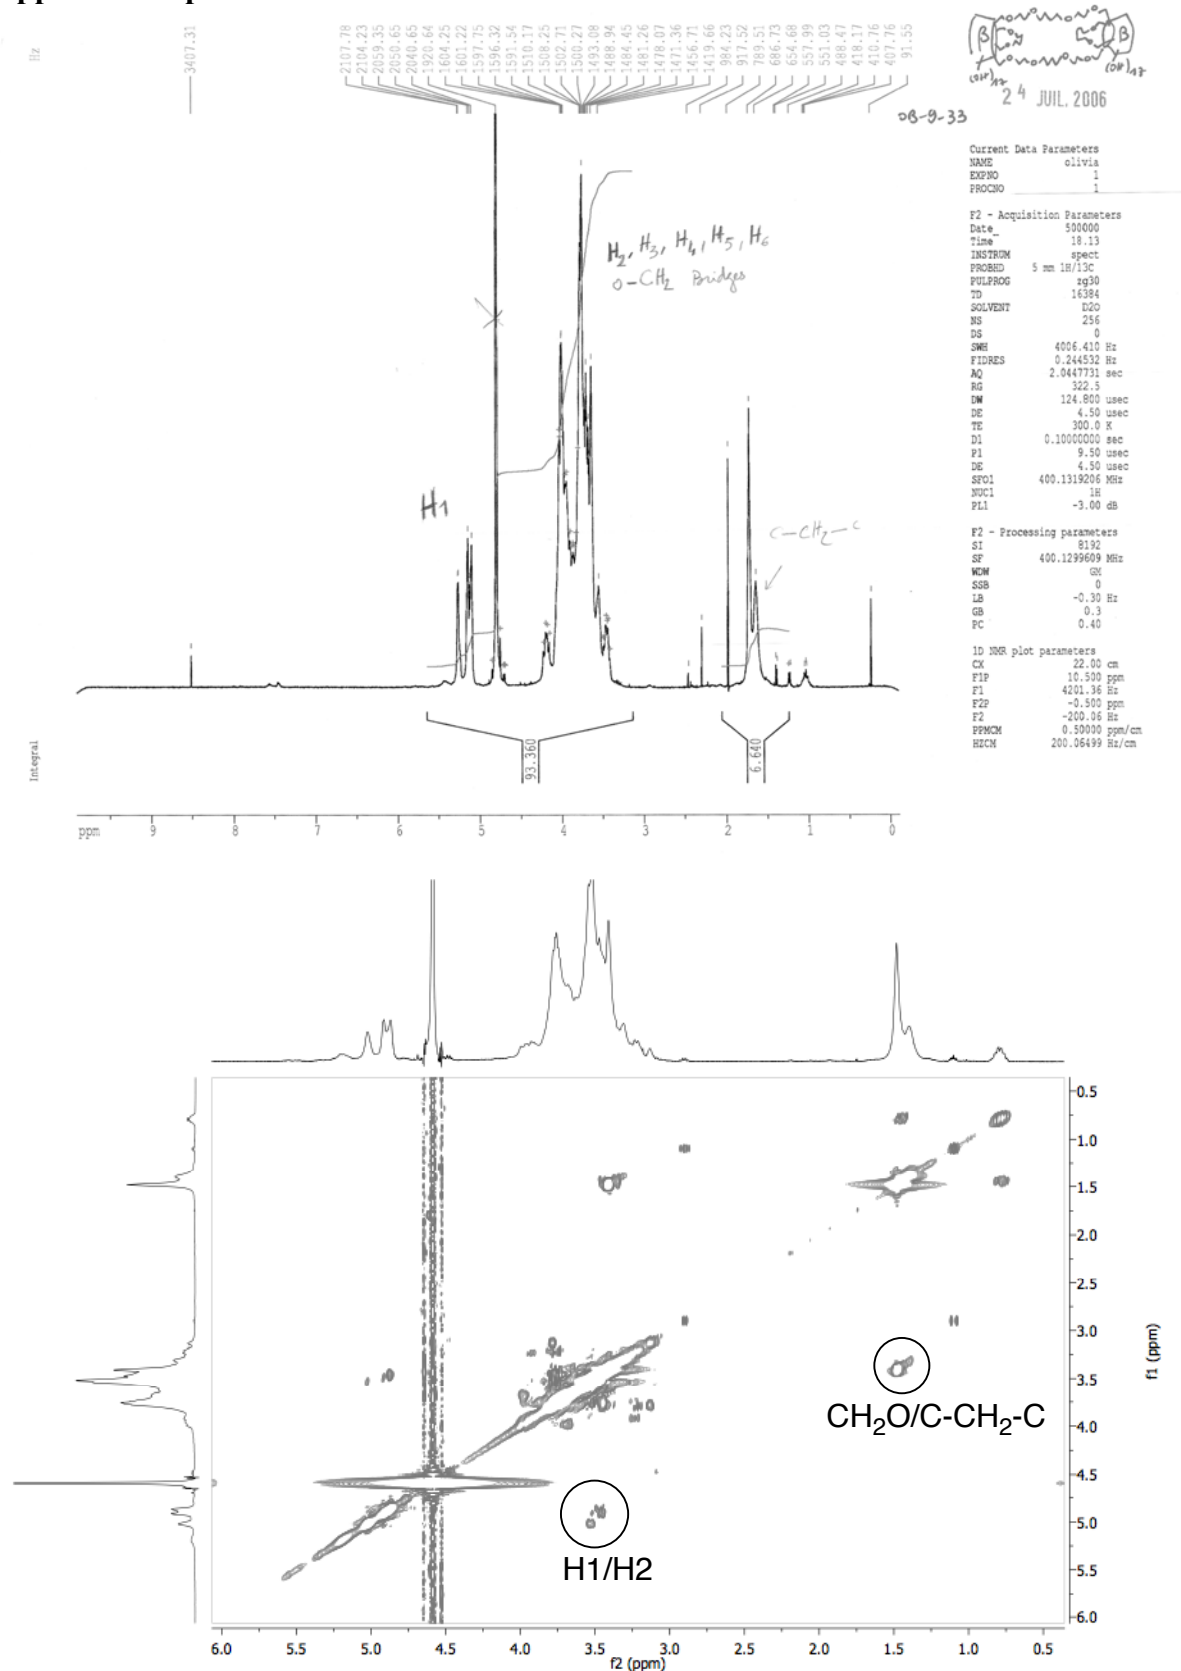

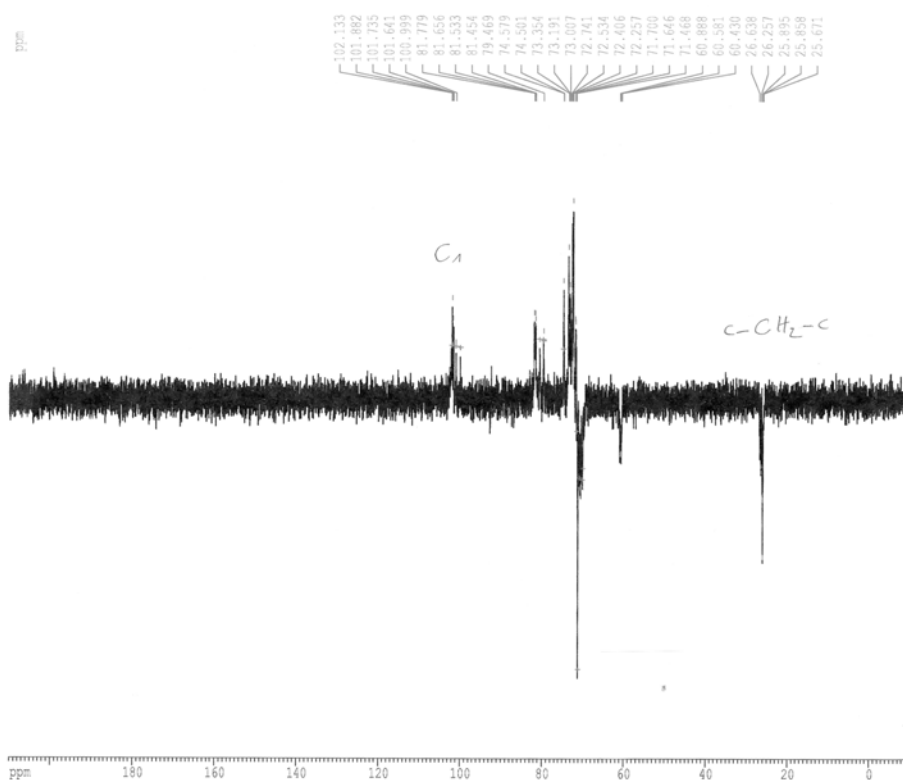

*Duplex Point*

Current Data Parameters  
NAME: c1v1ac  
EXPNO: 1  
PROCNO: 1

24 JUL 2006

F2 - Acquisition Parameters  
Date\_: 50000  
Time: 18.26  
INSTRUM: spect  
PROBHD: 5 mm 1H/13C  
PULPROG: jmod  
TD: 65536  
SOLVENT: d2o  
NS: 21800  
DS: 0  
SWH: 24154.590 Hz  
FIDRES: 0.338570 Hz  
AQ: 1.3565452 sec  
RG: 8192  
DW: 20.700 usec  
DE: 4.50 usec  
TE: 300.0 K  
P1: 16.00 usec  
DELTA: 0.000204 sec  
D20: 0.00714000 sec  
FL12: 17.50 dB  
D1: 1.2999995 sec  
CPCPRG2: waltz16  
PCPD2: 100.00 usec  
SFO2: 400.1317000 MHz  
NUC2: 13C  
P12: 120.00 dB  
D13: 0.00003000 sec  
F2: 32.00 usec  
SFO1: 100.6237964 MHz  
NUC1: 13C  
P11: 0.00 dB  
DE: 4.50 usec

F2 - Processing parameters  
SI: 32768  
SF: 100.6127290 MHz  
WDW: EM  
SSB: 0  
LB: 1.00 Hz  
GB: 0  
PC: 0.50

1D NMR plot parameters  
CX: 22.00 cm  
F1P: 210.000 ppm  
F1: 21128.67 Hz  
F2P: -10.000 ppm  
F2: -1006.13 Hz  
PPMCM: 10.00000 ppm/cm  
HZCM: 1006.12726 Hz/cm

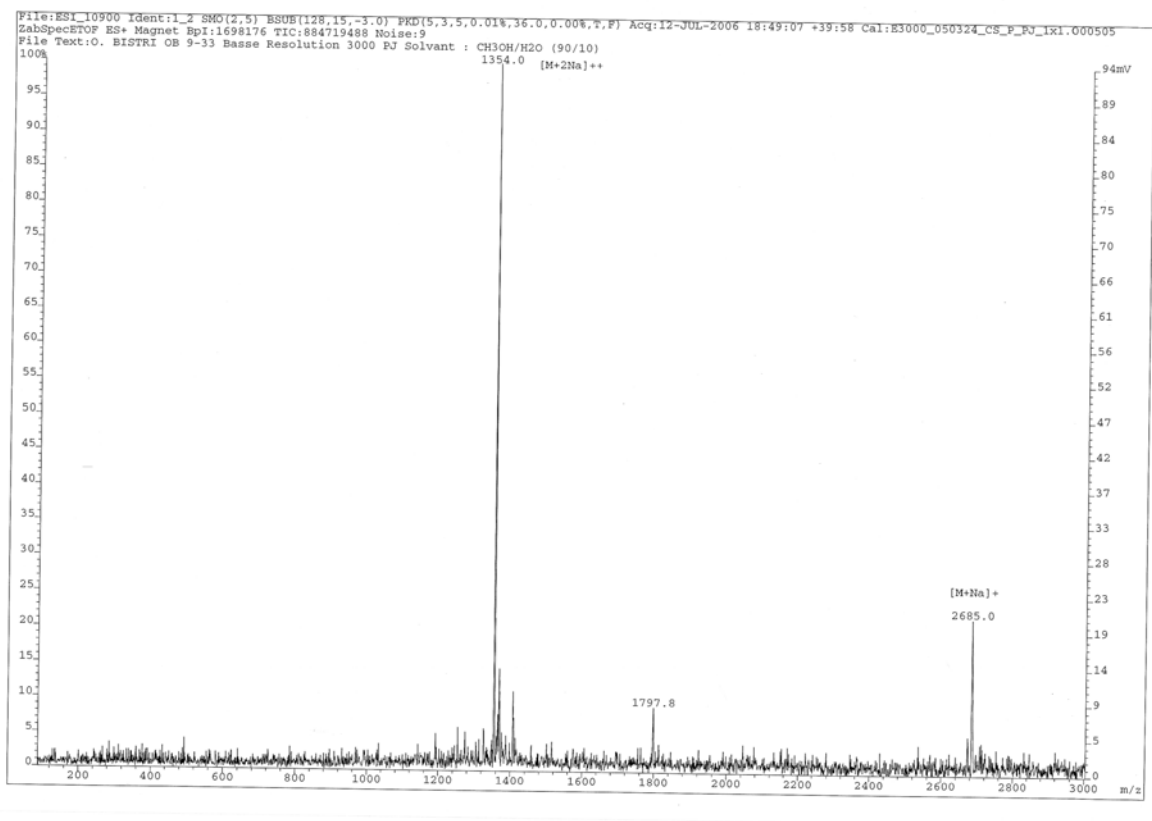



Supplementary Material (ESI) for Organic & Biomolecular Chemistry  
This journal is (c) The Royal Society of Chemistry 2010

[ Mass Spectrum ]  
Data : OLIVIA-OB-8-78-B-FAB+-NBA+Na Date : 07-Apr-2006 15:44  
Sample : -  
Note : -  
Inlet : Direct Ion Mode : FAB+  
Spectrum Type : Normal Ion [MF-Linear]  
RT : 1.32 min Scan# : 7  
BP : m/z 2826.6902 Int. : 411.01  
Output m/z range : 1013.9466 to 3621.9585 Cut Level : 0.00 %

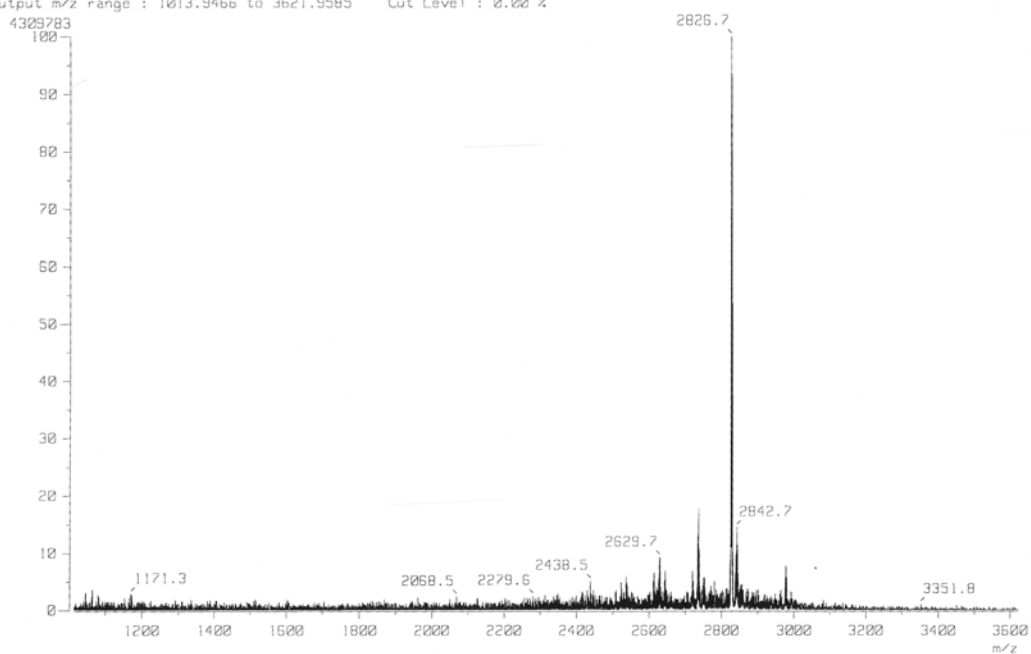

### Capped-CD dimer diol 16

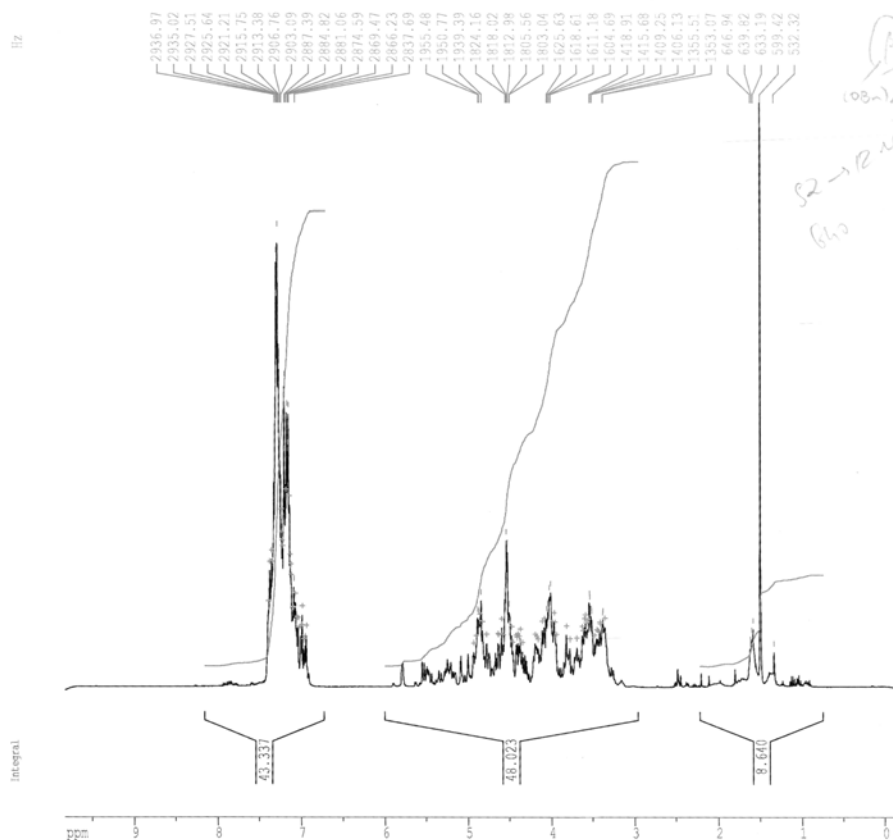

Current Data Parameters  
NAME olivia  
EXPNO 2  
PROCNO 1

F2 - Acquisition Parameters  
Date\_ 500000  
Time 15.51  
INSTRUM spect  
PROBHD 5 mm 1H/13C  
PULPROG zg30  
TD 16384  
SOLVENT CDCl3  
NS 160  
DS 0  
SWH 4006.410 Hz  
FIDRES 0.244532 Hz  
AQ 2.0447731 sec  
RG 64  
DM 124.800 usec  
DE 4.50 usec  
TE 300.0 K  
D1 0.10000000 sec  
P1 9.30 usec  
DE 4.50 usec  
SFO1 400.1319206 MHz  
NUC1 1H  
PL1 -3.00 dB

F2 - Processing parameters  
SC 8192  
SF 400.1299990 MHz  
WDW od  
SSB 0  
LB -0.30 Hz  
GB 0.3  
PC 0.30

1D NMR plot parameters  
CX 22.00 cm  
F1P 10.500 ppm  
F1 4201.37 Hz  
F2P -0.500 ppm  
F2 -200.07 Hz  
PPMCM 0.50000 ppm/cm  
HZCM 200.06500 Hz/cm

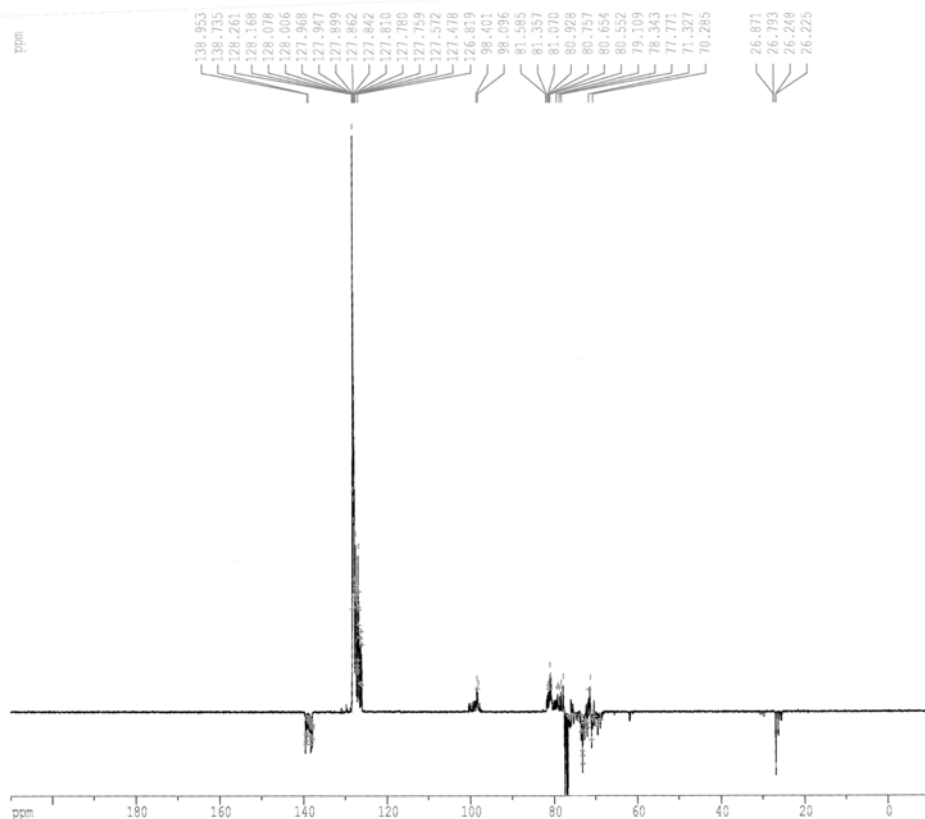

Current Data Parameters  
NAME oliviac  
EXPNO 4  
PROCNO 1  
14 AVR. 2006

F2 - Acquisition Parameters  
Date\_ 500000  
Time 10.22  
INSTRUM spect  
PROBHD 5 mm 1H/13C  
PULPROG fmod  
TD 65536  
SOLVENT CDCl3  
NS 26620  
DS 0  
SWH 24154.590 Hz  
FIDRES 0.368570 Hz  
AQ 1.3566452 sec  
RG 8192  
DM 20.700 usec  
DE 4.50 usec  
TE 300.0 K  
P1 16.00 usec  
DELTA 0.0000204 sec  
D20 0.00714000 sec  
PL12 17.50 dB  
D1 1.29999999 sec  
CF2PRG2 waltz16  
PCPD2 100.00 usec  
SFO2 400.1317000 MHz  
NUC2 13C  
PL2 120.00 dB  
D13 0.00003000 sec  
P2 32.00 usec  
SFO1 100.6237964 MHz  
NUC1 13C  
PL1 0.00 dB  
DE 4.50 usec

F2 - Processing parameters  
SI 32768  
SF 100.6127778 MHz  
WDW EM  
SSB 0  
LB 1.00 Hz  
GB 0  
PC 0.50

1D NMR plot parameters  
CX 22.00 cm  
F1P 210.000 ppm  
F1 21128.60 Hz  
F2P -10.000 ppm  
F2 -1006.13 Hz  
PPMCM 10.00000 ppm/cm  
HZCM 1006.12781 Hz/cm

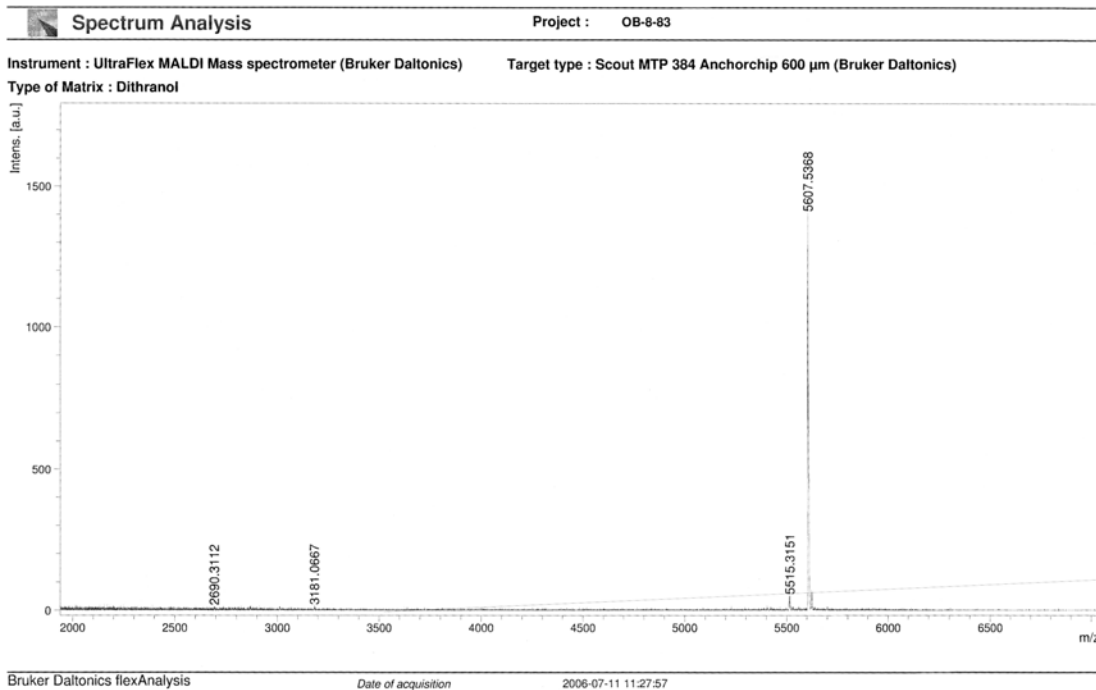

### Dialkylated capped-CD dimer 17

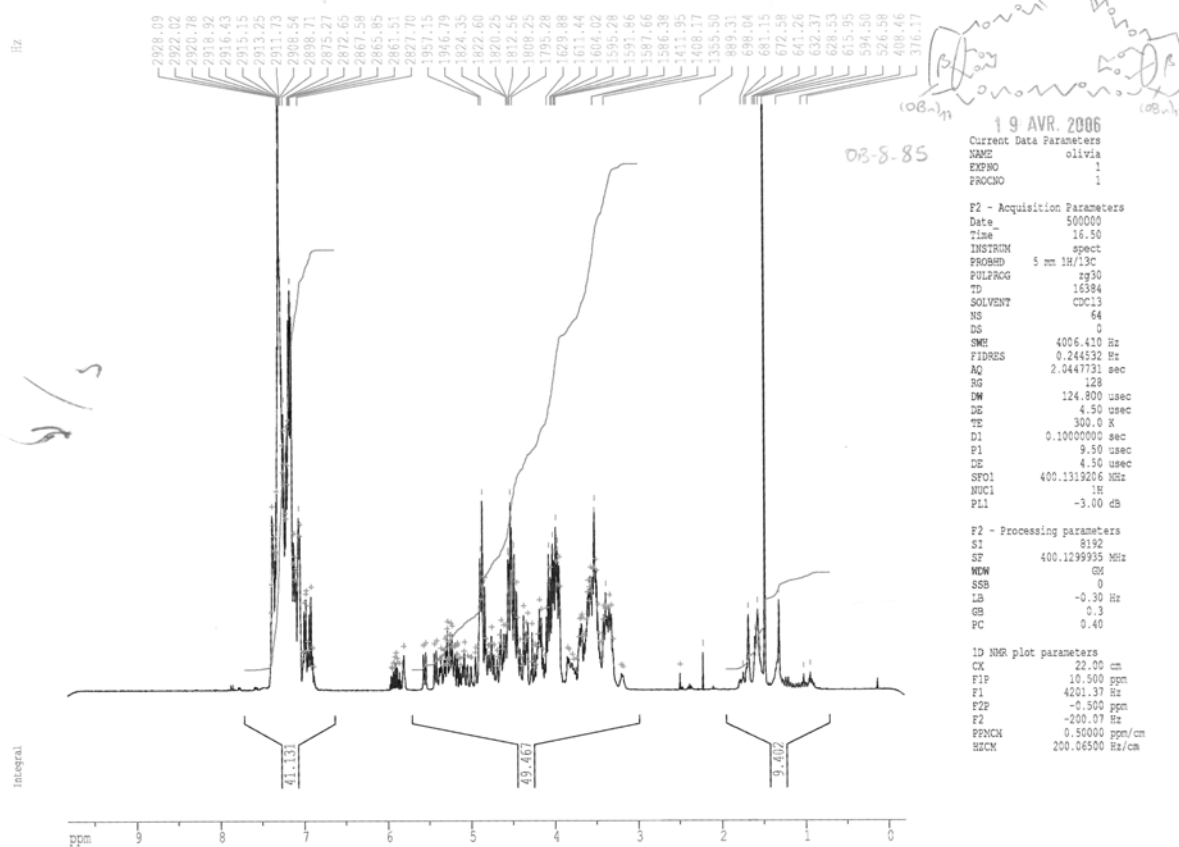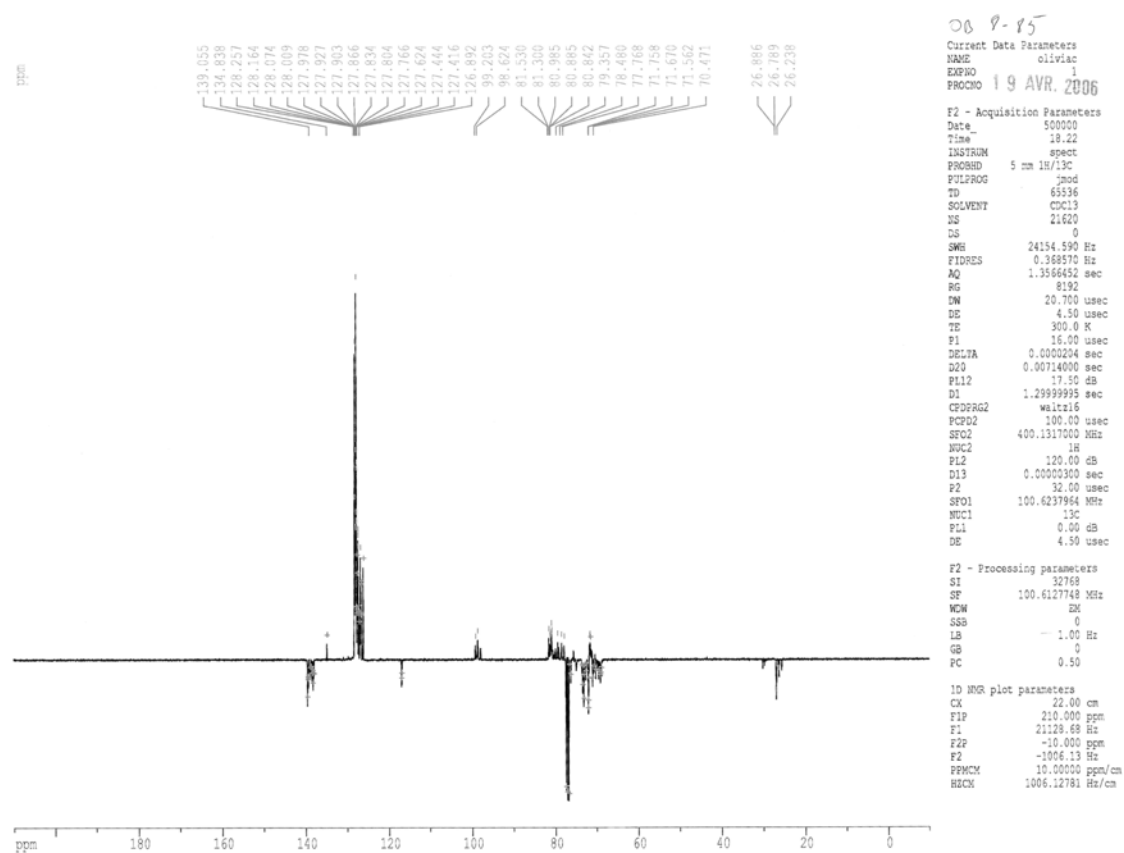

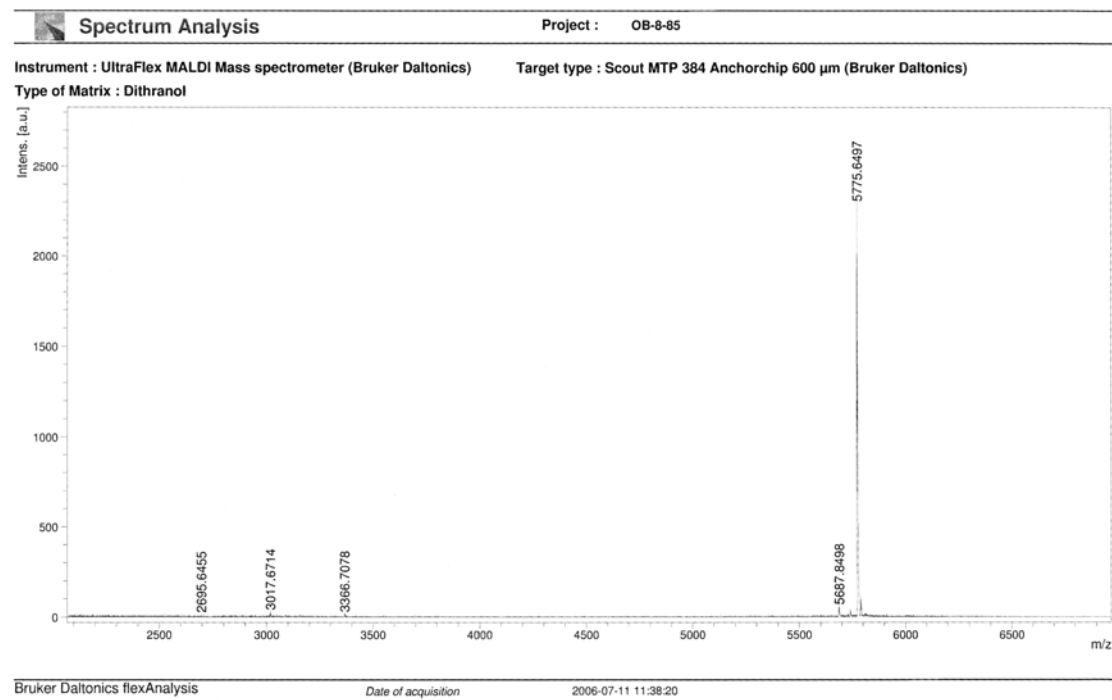



### Protected capped-CD duplex 18

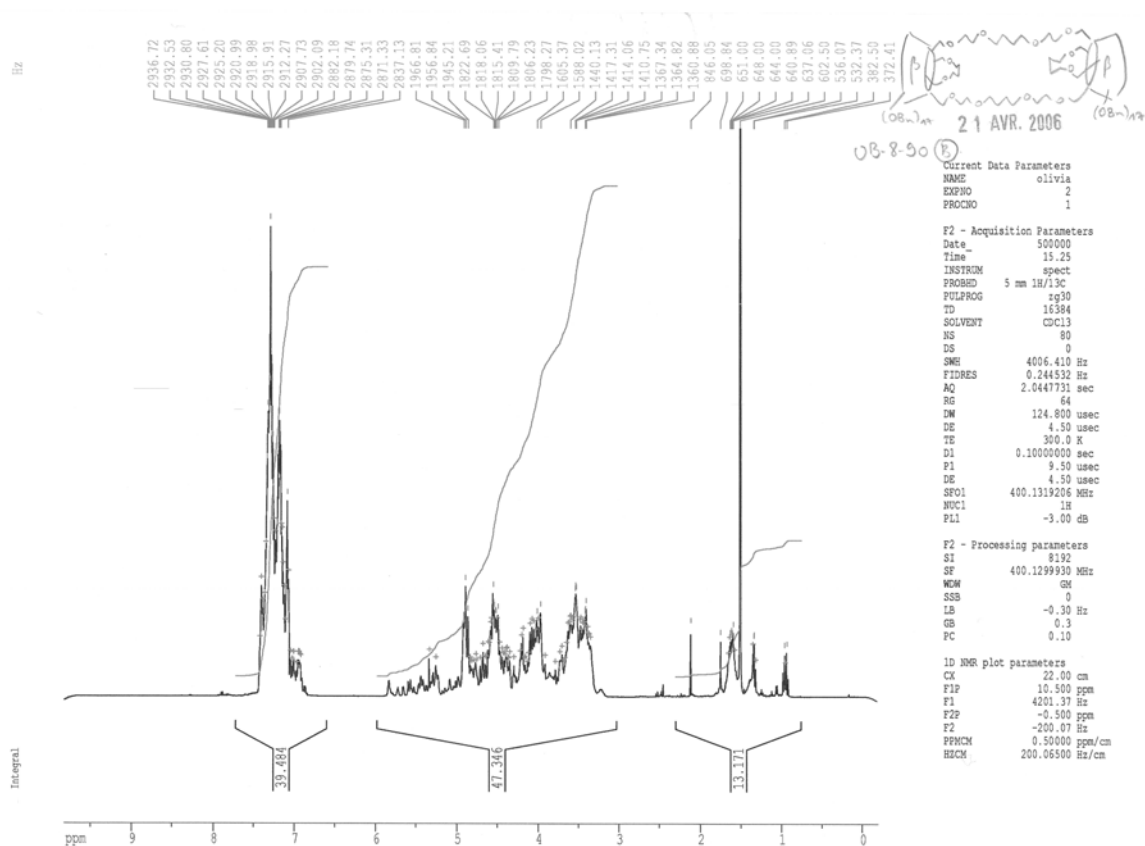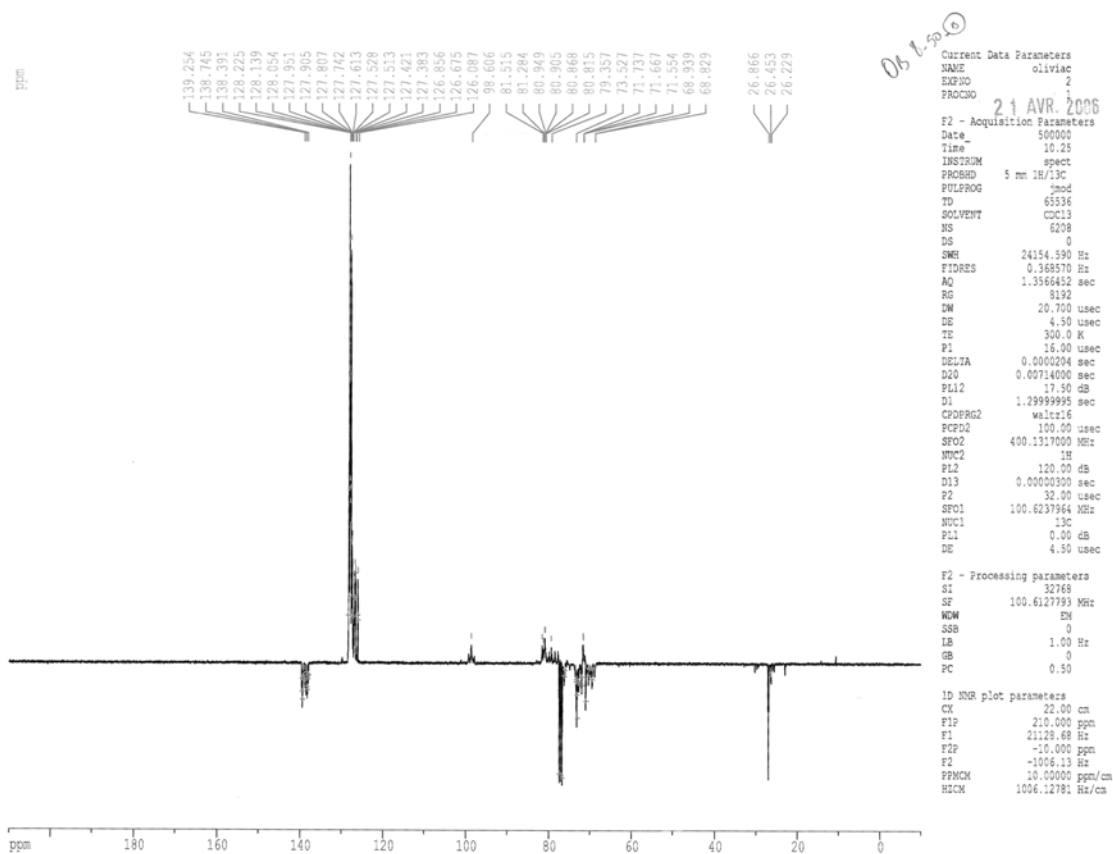

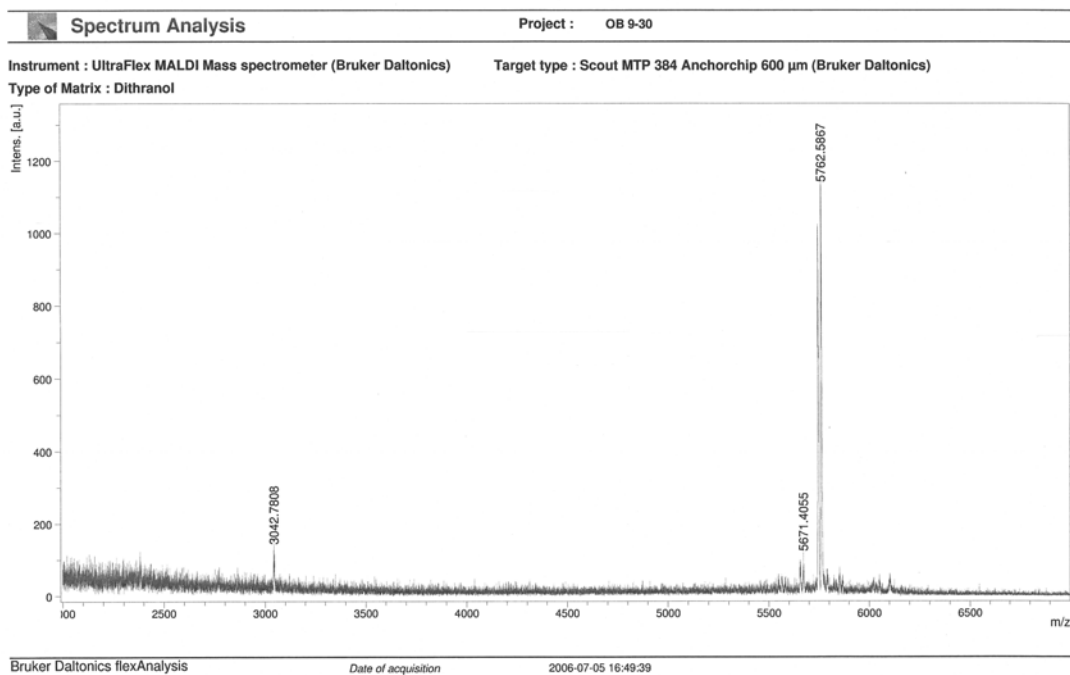

Supplement: c001531h.pdf [file c001531h.pdf]
